# 1 **Innovations to expand drone data collection and analysis for rangeland** 2 **monitoring**

3  
4 Jeffrey K. Gillan<sup>1†</sup>, Guillermo E. Ponce-Campos<sup>1</sup>, Tyson L. Swetnam<sup>2</sup>, Alessandra Gorlier<sup>1</sup>, Philip Heilman<sup>3</sup>,  
5 and Mitchel P. McClaran<sup>1</sup>

6  
7 <sup>1</sup>University of Arizona  
8 School of Natural Resources & Environment  
9 1064 East Lowell Street  
10 Tucson, AZ 85721

11  
12 <sup>2</sup>University of Arizona  
13 BIO5 Institute  
14 1657 East Helen Street  
15 Tucson, AZ 85721

16  
17 <sup>3</sup>USDA Agricultural Research Service  
18 Southwest Watershed Research Center  
19 2000 East Allen Road  
20 Tucson, AZ 85719

21  
22 <sup>†</sup>Corresponding Author  
23 Jeffrey K. Gillan  
24 Email: [jgillan@email.arizona.edu](mailto:jgillan@email.arizona.edu)

25  
26  
27 *Data, including raw imagery, point clouds (.laz & Entwine Point Tiles), digital surface models, digital*  
28 *terrain models, vegetation height models, and orthomosaics, and software code will be made available*  
29 *in Cyverse Data Commons through a stable DOI. This link is currently where the data resides and will get*  
30 *a permanent stable address once published.*

31 [https://datacommons.cyverse.org/browse/iplant/home/shared/aes/srer/suas/2019/ecostate\\_mapping](https://datacommons.cyverse.org/browse/iplant/home/shared/aes/srer/suas/2019/ecostate_mapping)  
32

33 *Python, R, HTML, and Google Earth Engine code used in this project can also be found at:*  
34 <https://github.com/jeffgillan/Drone-Imagery-Analysis>

35  
36  
37  
38  
39  
40

## 41 **Abstract**

42 In adaptive management of rangelands, monitoring is the vital link that connects management actions  
43 with on-the-ground changes. Traditional field monitoring methods can provide detailed information for  
44 assessing the health of rangelands, but cost often limits monitoring locations to a few key areas or  
45 random plots. Remotely sensed imagery, and drone-based imagery in particular, can observe larger  
46 areas than field methods while retaining high enough spatial resolution to estimate many rangeland  
47 indicators of interest. However, the geographic extent of drone imagery products is often limited to a  
48 few hectares (for resolution  $\leq 1$  cm) due to image collection and processing constraints. Overcoming  
49 these limitations would allow for more extensive observations and more frequent monitoring. We  
50 developed a workflow to increase the extent and speed of acquiring, processing, and analyzing drone  
51 imagery for repeated monitoring of two common indicators of interest to rangeland managers:  
52 vegetation cover and vegetation heights. By incorporating a suite of existing technologies in drones  
53 (real-time kinematic GPS), data processing (automation with Python scripts, high performance  
54 computing), and cloud-based analysis (Google Earth Engine), we greatly increased the efficiency of  
55 collecting, analyzing, and interpreting high volumes of drone imagery for rangeland monitoring. End-to-  
56 end, our workflow took 30 days, while a workflow without these innovations was estimated to require  
57 141 days to complete. The technology around drones and image analysis is rapidly advancing which is  
58 making high volume workflows easier to implement. Larger quantities of monitoring data will  
59 significantly improve our understanding of the impact management actions have on land processes and  
60 ecosystem traits.

61

## 62 **Keywords**

63 Unmanned aerial systems, high performance computing, cloud computing, RTK, monitor

64

65 Introduction

66 The rangeland manager's challenge is the extensive management across a heterogeneous landscape  
67 under an uncertain climate. With so much uncertainty, rangeland managers typically opt for an adaptive  
68 management approach, particularly in the public domain rangelands that dominate the western US.  
69 Adaptive management is not simply trial and error, but according to the Department of Interior  
70 (Williams et al., 2009): *An adaptive approach involves exploring alternative ways to meet management*  
71 *objectives, predicting the outcomes of alternatives based on the current state of knowledge,*  
72 *implementing one or more of these alternatives, monitoring to learn about the impacts of management*  
73 *actions, and then using the results to update knowledge and adjust management actions.* Unfortunately,  
74 budgetary and institutional constraints have long limited public land monitoring, as noted by Fernandez-  
75 Gimenez et al. (2005). Sayre et al. (2013) state that *monitoring is a critical component of adaptive*  
76 *management but often weak or missing in practice.* The premise of this paper is that expanded  
77 monitoring is a prerequisite for improved rangeland management.

78

79 Traditional field monitoring methods (e.g., transects or quadrats) can provide detailed information for  
80 assessing the health of rangelands. Cost, however, often limits monitoring locations to a few key areas  
81 or random plots that observe a small fraction of the land they are intended to represent (Booth and Cox,  
82 2011; Toevs et al., 2011; West, 2003). Remotely sensed imagery enables a broader view of the land and  
83 potentially a more representative sample. Drone-based imagery, in particular, can observe larger areas  
84 than field methods while retaining high enough spatial resolution to estimate many rangeland indicators  
85 of interest. These indicators include vegetation cover (Baena et al., 2017; Breckenridge et al., 2011;  
86 Hardin et al., 2007; Laliberte and Rango, 2011), vegetation heights (Cunliffe et al., 2016; Gillan et al.,  
87 2020; Jensen and Mathews, 2016; Olsoy et al., 2018), biomass (Cunliffe et al., 2016; Michez et al., 2019),

88 forage utilization (Gillan et al., 2019), and soil erosion (D'Oleire-Oltmanns et al., 2012; Gillan et al.,  
89 2017).

90

91 At present, leveraging small drones, off-the-shelf sensors, and structure-from-motion photogrammetry  
92 (SfM-MVS) is a low-cost workflow capable of meeting several rangeland monitoring needs. However,  
93 challenges remain to deploy this technology at larger operational scales. The geographic extent of drone  
94 imagery products is often limited to a few hectares (for spatial resolution  $\leq 1$  cm) due to image  
95 collection and processing constraints. Additionally, sharing data and reporting out monitoring results to  
96 collaborators and stakeholders can be limited by large file sizes and the complexity of web development.  
97 Overcoming these limitations would move us closer to realizing the potential value of drone-based  
98 monitoring, which is: 1. broader extent observations; 2. better measurement of some indicators; and 3.  
99 permanent visual records. Scaling the production and interpretation of drone imagery will be essential  
100 to support adaptive management on individual allotments as well as to integrate with national-scale  
101 monitoring programs such as the Bureau of Land Management's Assessment, Inventory, and Monitoring  
102 (AIM) strategy and the Natural Resource Conservation Service's National Resource Inventory (NRI).

103

104 Our objective was to develop a workflow to increase the extent and speed of acquiring, processing, and  
105 analyzing drone imagery for repeated monitoring of two common rangeland indicators: vegetation  
106 cover and vegetation heights. We compared the total number of workdays to execute our innovative  
107 workflow with the time required to complete a more conventional workflow. We then demonstrate  
108 sharing and visualization of the imagery products and results using free or open-source web tools. We  
109 focused on the workflow and did not directly assess the accuracy of indicator values compared with field  
110 methods. The workflow described here is an initial phase of a larger research project investigating the  
111 use of drone imagery for mapping ecological states (Steele et al., 2012).

112

## 113 Methods

### 114 *Study Area*

115 We conducted this research at Santa Rita Experimental Range (SRER) in southern Arizona (31°48'36"N,  
116 110°50'51"W; Fig. 1). The range, established in 1902, is a 21,000 ha Sonoran Desert grassland that has  
117 been significantly invaded by velvet mesquite (*Prosopis velutina*). SRER is a living laboratory for studying  
118 dryland ecology and sustainable livestock production. The range has over 200 permanent long-term  
119 transects intended to capture vegetation dynamics across multi-decadal time spans (McClaran et al.,  
120 2002; [cals.arizona.edu/srer](http://cals.arizona.edu/srer)). In the upper elevations of the range (1050-1300 m MSL; Major Land  
121 Resource Area 41-3), we selected a subset of 100 transects for this study. The long-term transect  
122 locations are not randomized and thus do not represent an unbiased sample of the study area. It was  
123 not our intent to extrapolate results to monitor all of SRER. Instead, the legacy transect locations  
124 provided a large sample size from which to demonstrate our workflow.

125

### 126 *Image Acquisition*

127 We collected drone imagery covering the 100 transects in May 2019 (dry season) and repeated the  
128 acquisition in September 2019 (monsoon season). We used a DJI Phantom 4 RTK quadcopter specifically  
129 because it possessed a real-time kinematic global navigation satellite system (**RTK GNSS**). RTK GNSS on  
130 drones is not a new technology, but it is now more accessible due to its integration in off-the-shelf  
131 aircraft at reduced cost. The Phantom 4 RTK in 2019 cost ~\$8,000 and came paired with a portable GNSS  
132 base station and tripod (D-RTK 2).

133

134 RTK is a technology that pinpoints the 3D coordinates of the camera for each image taken from the  
135 moving drone. It can be accurate within a few centimeters, which is more precise than a typical global

136 positioning system (GPS) receiver is. RTK GNSS is a differential correction system where the aircraft is in  
137 constant communication with a nearby portable base station with known coordinates (i.e., placed over a  
138 surveyed benchmark). When an image is taken, the location of the drone (and more specifically the  
139 camera), as estimated from the onboard GPS, is compared with and corrected by a signal from the base  
140 station. The improved location coordinates (i.e., latitude, longitude, elevation) are then recorded as  
141 metadata on the exchangeable image format (EXIF) header of each image.

142  
143 Highly accurate camera locations can replace the use of ground control points (GCPs) to scale and  
144 georeference imagery products such as point clouds and orthomosaics (Forlani et al., 2018; Hugenholtz  
145 et al., 2016; Rehak et al., 2013). RTK allowed us to streamline two aspects of the workflow. First, it  
146 eliminated the need to place and survey GCPs with either a total station or ground-based differential  
147 GPS. It can be quite cumbersome to survey GCPs, especially for large flight areas that may require a  
148 dozen or more. Second, labor was eliminated in the photogrammetry processing step of identifying each  
149 GCP in every image. Algorithms in commercial software aimed at automatically identifying GCPs are not  
150 always successful, especially for oblique angle views. With RTK drones, we can collect and create high-  
151 quality image products over large extents, while a GCP workflow practically limits us to plot scales.

152  
153 Prior to this study, SRER had only one known surveyed benchmark. We established and surveyed more  
154 benchmarks using a Trimble R10 RTK GNSS (base station and rover). We set the Trimble base station  
155 over the original benchmark and roved across the range setting up new benchmark points near all of the  
156 flight transects. Because of some transect clustering, we needed just 39 benchmarks to cover the 100  
157 transects (Fig. 1). The benchmark points were existing rebar posts that marked the ends of long-term  
158 transects. Absolute accuracy of the surveyed benchmarks was < 1 cm horizontal and 1-1.5 cm vertical.

159 We used the drone portable base station (D-RTK 2) placed over the benchmarks to facilitate RTK  
160 location correction while the drone flew and collected images.

161

162 Through our own independent assessment, we found the RTK drone imagery products (flown at 38 m  
163 above ground level) to have horizontal location accuracy of 2.2 cm and vertical accuracy of 3.4 cm. This  
164 was within ~1 cm, both horizontally and vertically, of an assessment conducted by DroneDeploy  
165 (Mulakala, 2019). Our reproducibility assessment yielded a horizontal precision of 3 cm and vertical  
166 precision of < 1 cm for digital surface models.

167

168 For each of the two campaigns (dry and wet seasons), we collected 53 flight plots to cover the 100  
169 transects, a total of 193.1 ha (Fig. 1). Transects that were very near each other (< 300 m) were often  
170 captured in a single image product. Flight plots ranged in size from 1.6 to 7.1 ha to meet the objectives  
171 of the ecological state mapping project. We collected a high density of nadir and oblique images (~200  
172 ha<sup>-1</sup>) in order to create very detailed and accurate point cloud models and downstream products such as  
173 vegetation height models (VHMs). See Table 1 for full sensor and acquisition specifications and Fig. 2 for  
174 a chart of the entire workflow.

175

### 176 *Image Product Creation*

177 Eliminating ground control points through the use of RTK enabled us to **fully automate imagery product**  
178 **creation with Python scripts**. What would take an analyst a few hours to complete interactively (in  
179 addition to the dense point cloud reconstruction time), was scripted in Agisoft Metashape 1.5.2  
180 ([www.agisoft.ru](http://www.agisoft.ru)). The general SfM-MVS workflow is well documented so it will be abbreviated here (see  
181 Eltner et al., 2015; Smith et al., 2015; Snavely et al., 2008; Westoby et al., 2012). Python scripts, running  
182 from command line, added imagery to the project, created the sparse point cloud, filtered poor quality

183 points, optimized the sparse model, then generated dense point clouds, digital surface models, digital  
184 terrain models, and orthomosaics (see Table 2 for processing parameters). When the plot completed, it  
185 seamlessly started the next plot. Image processing reports were later spot checked for quality  
186 assurance.

187

188 In addition to scripting, we used **high performance computing (HPC)** to quicken image product creation  
189 for the twenty largest flight plots (801-1600 images each). We used the University of Arizona HPC  
190 system called Ocelote. Each CPU node was an Intel Haswell V3 28 core processor with 192 GB RAM.  
191 They also had Graphical Processing Units (GPU) nodes with one Nvidia P100 GPU, 28 cores, and 256 GB  
192 RAM. The type and number of nodes used depended on the availability of HPC resources. We typically  
193 used between 10-15 nodes working in parallel, each running an instance of Metashape, which was  
194 designed with network processing in mind. Each Metashape instance and license operated through  
195 container software Singularity ([singularity.lbl.gov](http://singularity.lbl.gov)). Containers enabled us to package our computing  
196 environment, including software installs and licenses, for easy deployment on the remote HPC nodes.  
197 We had to purchase educational Metashape licenses for each processing node (~\$500 each). Our  
198 Metashape instance ‘master’ was located on a Linux server while the worker nodes were provided by  
199 the HPC (also Linux). For the 33 smaller plot areas (278-800 images), we used a Windows desktop  
200 machine (hereafter as the PC) with two Intel Xeon CPUs (2.4 GHz; 16 logical processors each), two Nvidia  
201 GeForce GTX 1080 video cards (GPUs), and 256 GB RAM.

202

203 Using both the HPC and the PC simultaneously, it took approximately two weeks to produce the entire  
204 suite of imagery products (point clouds .las, digital terrain models .tif, digital surface models .tif,  
205 orthomosaics .tif) for one collection campaign, a total of 561 GB (Fig. 3). We then generated vegetation  
206 height models (VHMs) for each plot area by subtracting the digital terrain model from the digital surface



207 model on a cell-by-cell basis using the *Raster* package in Rstudio. This was executed on the PC and took  
208 approximately 4 hours to complete. With a simple shell command (see  
209 <https://entwine.io/quickstart.html>), we converted all of the .las point clouds to entwine point tile (EPT),  
210 a format that facilitates browser-based viewing of large point clouds. We uploaded all image products  
211 and raw imagery to Cyverse Data Commons ([cyverse.org/data-commons/](http://cyverse.org/data-commons/)....pending DOI) for public  
212 access and long-term storage.

### 213 214 *Image Product Analysis*

215 As large drone imagery datasets outpace desktop computing power, new tools are needed for rapid  
216 analysis, visualization, and sharing. We used the **cloud-based analysis platform Google Earth Engine**  
217 **(GEE; [earthengine.google.com](http://earthengine.google.com))** to derive additional value-added indicators from the imagery products.  
218 GEE is a cloud-based geospatial analytics platform with access to large computational resources and two  
219 application programming interfaces (API), JavaScript and Python. These APIs provide a suite of raster  
220 analysis functions including several classification algorithms (Gorelick et al., 2017). Though it was built  
221 primarily for broad scale satellite imagery, it is free and can also handle very large drone datasets. A  
222 powerful feature of GEE is the ability to easily share JavaScript code and imagery assets between users,  
223 which can make imagery analysis collaborative.

224  
225 We uploaded all orthomosaics from the May acquisition (n=53) into GEE and then mosaicked them  
226 together to form a single large super-mosaic (19.3 billion pixels). We repeated these steps for the May  
227 VHMs, September orthomosaics, and September VHMs. We used red, green, and blue bands, vegetation  
228 heights, and a calculated green leaf algorithm ( $\frac{G*2-R-B}{G*2+R+B}$ ; Louhaichi et al. 2001) as input features to  
229 thematically classify the imagery with a machine learning classification tree algorithm (Breiman et al.,  
230 1984). We identified four cover classes as a simple demonstration of the tool and workflow: herbaceous

231 vegetation, woody vegetation (including cactus), bare-ground, and shadow. We used the polygon  
232 digitizing tool within GEE to select training data for each class. We generated seven training polygons for  
233 each class, with each training polygon containing hundreds of training pixels. For classification  
234 validation, we randomly selected 50 pixels for each class across the super-mosaic. These pixels were  
235 visually interpreted and compared with their assigned class.

236

237 For comparison with a conventional workflow, we classified the drone imagery using ArcGIS Pro 2.5  
238 (esri.com) installed on the PC. We used the same input features and basic training procedures as our  
239 GEE workflow. Instead of merging all the orthomosaics into a super-mosaic (as we did in GEE), we used  
240 *Model Builder* to automate the sequentially classification of each orthomosaic using the *Random Trees*  
241 algorithm. We enabled parallel processing to use all available CPUs for faster classification.

242

#### 243 *Visualization and Sharing*

244 For sharing monitoring results and image product visualization on the web, we chose two platforms. We  
245 developed a public facing web-app directly in GEE that enables users to view the orthomosaics, VHMs,  
246 classified maps, and see summaries of the vegetation cover and vegetation heights. The website was  
247 developed with JavaScript and is served through Google Cloud. Additionally, we developed a mapping  
248 application using Leaflet, an open-source JavaScript library (<https://de.cyverse.org/....pending DOI>).  
249 Users are able to explore a map of all the flight plots at SRER. Clicking on individual plots invites users to  
250 view high-resolution versions of the orthomosaics and 3D point clouds directly in their web browser. The  
251 orthomosaics are displayed in Eox Cog Explorer (<https://geotiffjs.github.io>). The point clouds are  
252 viewable using Potree (entwine.potree.io), a free open-source web graphics library that renders point  
253 clouds directly in your web browser using the EPT format.

254

255

## 256 Results and Discussion

257 By incorporating a suite of existing technologies in drones (RTK GNSS), data processing (automation with  
258 Python scripts, high performance computing), and cloud-based analysis (Google Earth Engine), we  
259 increased the efficiency of collecting, analyzing, and interpreting high volumes of drone imagery for  
260 rangeland monitoring. End-to-end, our workflow took 30 days, while a workflow without these  
261 innovations was estimated to require 141 days to complete (Table 3).

262

263 RTK saved us considerable time in the image collection step (Table 3). With a GCP workflow, small plots  
264 would require 5 to 8 GCPs, and larger plots could require 10 to 20 GCPs to achieve accuracies  
265 comparable to the RTK results (James et al., 2017; Sanz-Ablanedo et al., 2018). A conservative estimate  
266 would be 300 GCPs for all of the flight plots, which could take upwards of 30 workdays to install and  
267 survey. Our RTK workflow, for comparison, required just 3 days to survey 39 benchmarks at existing  
268 stakes. Placing and collecting GCP targets before and after the flights would add an additional ~30  
269 minutes to each plot. This could push the total number of flying days from 12 (with RTK) to 16. Our RTK  
270 workflow eliminated the manual labor of identifying GCPs during the image processing step, which could  
271 take hours per plot. We estimated a savings of 20 workdays by eliminating manual GCP identification.

272

273 Other potentially more efficient options for image product referencing exist. For example, cellular tower  
274 virtual reference systems can send correction signals to flying drones using tablets or smartphone  
275 devices as an intermediary. These correction networks could eliminate our need to use portable base  
276 stations and surveyed benchmarks. In Southern Arizona, a private company provides the correction  
277 signal as a service, but we decided against this option because strong cellular reception was not reliable  
278 everywhere in the study area. As cellular coverage expands, even across rural rangelands, virtual

279 reference systems will become increasingly viable for drone image product referencing. Alternatively,  
280 the drone and portable base station workflow used in this project could be executed without surveying  
281 benchmarks. In remote areas where high-precision surveying is not practical or the equipment is not  
282 available, drone image products can be corrected to have high *relative* accuracy. In this case, the image  
283 products are correctly scaled but may be shifted horizontally or vertically from a true absolute position  
284 (see Gillan et al., 2020).

285  
286 The HPC was 14 to 24x faster than the PC at dense point cloud reconstruction, depending on the  
287 number of HPC nodes and the total number of images in the Metashape project. Plots with larger  
288 numbers of images required much greater (non-linear increases) processing time and showed the most  
289 speed gains through the HPC. For example, a plot with 900 images that took 24 hours to process on the  
290 PC, was completed in 1.6 hours on the HPC. A 1500 image plot that took 120 hours to process on the PC,  
291 was completed in 5 hours on the HPC. By using the HPC on the twenty largest plots, we saved ~45 days  
292 of image processing. Additionally, scripting increased the speed of processing the plots on the PC by  
293 processing 24 hours per day including starting jobs in the middle of the night. This probably saved ~15  
294 days.

295  
296 In the near future, computational power will not be a hindrance to high volume drone data. For  
297 example, recent software updates to Agisoft Metashape (v. 1.6.2) have significantly increased the speed  
298 of image processing on PC and HPCs. We can now expect the processing time to be 3-8x faster than  
299 described in this paper. HPC is becoming increasingly available through many universities with easier to  
300 use interfaces (Settlage et al., 2019). Alternatively, image processing can be outsourced (via the web) to  
301 commercial entities including DroneDeploy ([dronedeploy.com](https://www.dronedeploy.com)), Pix4D ([pix4d.com](https://www.pix4d.com)), and Delair  
302 ([delair.aero](https://delair.aero)).

303

304 Classifying all drone orthomosaics in GEE was essentially instant. Near instant feedback allowed us to  
305 quickly assess classification results and adjust training data for higher accuracy (see Appendix Tables S1  
306 & S2 for confusion matrices). In comparison, it took ~3 hours to classify 53 orthomosaics using ArcGIS  
307 Pro on the PC.

308

309 GEE worked well for classifying the imagery and is currently the most mature tool for quickly analyzing  
310 large quantities of drone imagery. However, limitations of the platform include data storage limits and  
311 upload/download speeds to and from GEE. Additionally, it has limited functionality to conduct every  
312 analysis we might want for rangeland monitoring (e.g., 3D point cloud analysis; landscape metrics). A  
313 greater variety of analysis options exist in ArcGIS Pro, but they may be less accessible to users due to  
314 cost. Fortunately, there is an enormous and growing variety of image analysis tools available across  
315 open platforms such as R, Python, and QGIS. Many have the capability to maximize local computing  
316 resources and distribute processing tasks to HPC clusters (see parallel processing options for [R](#) and  
317 [Python](#)). The availability of high throughput analysis tools will soon not be a constraint. Instead, the  
318 challenge will be to identify workflow ‘best practices’ for estimating a suite of rangeland indicators and  
319 selecting the best mix of tools that are cost-effective and repeatable (Gillan et al., 2020).

320

321 Leaflet paired with Eox COG Explorer and Potree provided an easy-to-build web map for visualizing the  
322 point cloud and orthomosaic products (Fig. 4; <https://de.cyverse.org/....pending DOI>). The Potree viewer  
323 has basic analysis tools (distance, volume, profile). The GEE app enabled us to share the classified maps,  
324 VHMs, and graphed summaries of vegetation cover and heights (Fig. 5; <https://bit.ly/srer-drone-2019>).  
325 Both of these sharing options eliminated the need for collaborators to download large files or install 3<sup>rd</sup>  
326 party software on their local machines.

327

328 *Implications*

329 High volume drone imagery will enable us to move beyond ‘proofs of concept’ and other small-scale  
330 research demonstrations to data quantities that significantly improve our understanding of land  
331 processes. In an adaptive management framework, this means expanding monitoring beyond the  
332 confines of plots and transects to provide a more representative sample of vegetation characteristics  
333 across rangelands. A more representative sample could increase the statistical power to detect indicator  
334 change by either increasing the sample size (i.e., collecting imagery at more locations than transects), or  
335 by expanding the observational area of each transect to reduce variance between samples (Sundt,  
336 2002). Our drone imagery covered 193 ha during the dry and wet seasons each representing 1.3% of  
337 MLRA 41-3 at SRER. For comparison, the 100 permanent field transects (with length of 30.48 m and  
338 width of 0.3 m) observes a total of 0.09 ha which is only 0.00006% of MLRA 41-3 at SRER.

339

340 The economies of scale provided by high volume drone imagery could be an appealing dataset to  
341 supplement field data collected for national-scale monitoring programs such as BLM AIM and NRI (Gillan  
342 2020). Though it has limited ability to distinguish grass and forb species, drone imagery can expand  
343 generalized estimates of vegetation cover, provide a more robust measure of vegetation heights, and  
344 enable the development of landscape metrics not measurable from the ground. Additionally, drone  
345 imagery estimates of vegetation cover can be ‘upscaled’ to satellite imagery to cover vast landscapes  
346 (Elkind et al., 2019; Holifield-Collins et al., 2020).

347

348 All of the technologies described in this paper are available to most range practitioners in the US.  
349 Though there are some current barriers related to cost (drone equipment and software licenses), cyber  
350 infrastructure, and technical expertise, these barriers are dissolving. Drone technology and image

351 processing software are advancing and becoming cheaper. HPC, though still housed primarily at  
352 universities and government agencies, is becoming more common and available to outside users (via  
353 web portals). Remote sensing specialists or data scientists should carry out our innovative workflow but  
354 the results and imagery products can easily be shared with less technical collaborators and stakeholders.

355

## 356 Conclusion

357 We demonstrated a workflow to increase the efficiency of collecting, processing, and analyzing large  
358 volumes of drone imagery for rangeland monitoring applications. Our innovative workflow saved an  
359 estimated 111 workdays compared with a conventional approach. These cost savings make more  
360 practical a rich stream of monitoring data from which to link ecosystem traits with management actions.  
361 The technological barriers surrounding the use of drone imagery are quickly dissolving which will foster  
362 wider adoption by those who study and manage public rangelands.

363

## 364 Acknowledgements

365 This material is based upon work supported by the U.S. Department of Agriculture, Agricultural Research  
366 Service, under Agreement No. 58-2022-5-13. This research was a contribution from the Long-Term  
367 Agroecosystem Research (LTAR) network. LTAR is supported by the U.S. Department of Agriculture. Any  
368 opinions, findings, conclusion, or recommendations expressed in this publication are those of the  
369 author(s) and do not necessarily reflect the view of the U.S. Department of Agriculture.

370

371 Mention of a proprietary product does not constitute a guarantee or warranty of the products by the  
372 U.S. Government or the authors and does not imply its approval to the exclusion of other products that  
373 may be suitable.

374

375 The authors declare no conflicts of interest.

376

377

378

379

## 380 Literature Cited

381 Baena, S., Moat, J., Whaley, O., Boyd, D.S., 2017. Identifying species from the air: UAVs and the very high

382 resolution challenge for plant conservation. *PLoS One* 12, e0188714.

383 <https://doi.org/10.1371/journal.pone.0188714>

384 Booth, D., Cox, S., 2011. Art to science: Tools for greater objectivity in resource monitoring. *Rangelands*

385 33, 27–34. <https://doi.org/10.2111/1551-501x-33.4.27>

386 Breckenridge, R.P., Dakins, M., Bunting, S., Harbour, J.L., White, S., 2011. Comparison of Unmanned

387 Aerial Vehicle Platforms for Assessing Vegetation Cover in Sagebrush Steppe Ecosystems. *Rangel.*

388 *Ecol. Manag.* 64, 521–532. <https://doi.org/10.2111/REM-D-10-00030.1>

389 Breiman, J., Friedman, J., Olshen, R., Stone, C., 1984. *Classification and regression trees*. Chapman and

390 Hall.

391 Cunliffe, A.M., Brazier, R.E., Anderson, K., 2016. Ultra-fine grain landscape-scale quantification of

392 dryland vegetation structure with drone-acquired structure-from-motion photogrammetry.

393 *Remote Sens. Environ.* 183, 129–143. <https://doi.org/10.1016/j.rse.2016.05.019>

394 D’Oleire-Oltmanns, S., Marzloff, I., Peter, K., Ries, J., 2012. Unmanned Aerial Vehicle (UAV) for

395 Monitoring Soil Erosion in Morocco. *Remote Sens.* 4, 3390–3416.

396 <https://doi.org/10.3390/rs4113390>

397 Elkind, K., Sankey, T.T., Munson, S.M., Aslan, C.E., 2019. Invasive buffelgrass detection using high-



398 resolution satellite and UAV imagery on Google Earth Engine. *Remote Sens. Ecol. Conserv.*  
399 *rse2.116*. <https://doi.org/10.1002/rse2.116>

400 Eltner, A., Kaiser, A., Castillo, C., Rock, G., Neugirg, F., Abellan, A., 2015. Image-based surface  
401 reconstruction in geomorphometry – merits, limits and developments of a promising tool for  
402 geoscientists. *Earth Surf. Dyn. Discuss.* 3, 1445–1508. <https://doi.org/10.5194/esurfd-3-1445-2015>

403 Fernandez-Gimenez, M.E., McClaran, S.J., Ruyle, G., 2005. Arizona permittee and land management  
404 agency employee attitudes toward rangeland monitoring by permittees. *Rangel. Ecol. Manag.* 58,  
405 344–351. [https://doi.org/10.2111/1551-5028\(2005\)058\[0344:APALMA\]2.0.CO;2](https://doi.org/10.2111/1551-5028(2005)058[0344:APALMA]2.0.CO;2)

406 Forlani, G., Dall’Asta, E., Diotri, F., Cella, U.M. di, Roncella, R., Santise, M., 2018. Quality Assessment of  
407 DSMs Produced from UAV Flights Georeferenced with On-Board RTK Positioning. *Remote Sens.* 10,  
408 311. <https://doi.org/10.3390/rs10020311>

409 Gillan, J., Karl, J., Elaksher, A., Duniway, M., 2017. Fine-Resolution Repeat Topographic Surveying of  
410 Dryland Landscapes Using UAS-Based Structure-from-Motion Photogrammetry: Assessing Accuracy  
411 and Precision against Traditional Ground-Based Erosion Measurements. *Remote Sens.* 9, 437.  
412 <https://doi.org/10.3390/rs9050437>

413 Gillan, J.K., Karl, J.W., van Leeuwen, W.J.D., 2020. Integrating drone imagery with existing rangeland  
414 monitoring programs. *Environ. Monit. Assess.* 192, 269. [https://doi.org/10.1007/s10661-020-8216-](https://doi.org/10.1007/s10661-020-8216-3)  
415 [3](https://doi.org/10.1007/s10661-020-8216-3)

416 Gillan, J.K., McClaran, M.P., Swetnam, T.L., Heilman, P., 2019. Estimating Forage Utilization with Drone-  
417 Based Photogrammetric Point Clouds. *Rangel. Ecol. Manag.* 72, 575–585.  
418 <https://doi.org/10.1016/j.rama.2019.02.009>

419 Gorelick, N., Hancher, M., Dixon, M., Ilyushchenko, S., Thau, D., Moore, R., 2017. Google Earth Engine:  
420 Planetary-scale geospatial analysis for everyone. *Remote Sens. Environ.* 202, 18–27.  
421 <https://doi.org/10.1016/j.rse.2017.06.031>

- 422 Hardin, P., Jackson, M., Anderson, V., Johnson, R., 2007. Detecting Squarrose Knapweed ( *Centaurea*  
423 *virgata* Lam. Ssp. *squarrosa* Gugl.) Using a Remotely Piloted Vehicle: A Utah Case Study. *GIScience*  
424 *Remote Sens.* 44, 203–219. <https://doi.org/10.2747/1548-1603.44.3.203>
- 425 Holifield-Collins, C., Skirvin, S., Winston, Z., Curley, D., Corrales, A., Armendariz, G., Gillan, J., Heilman, P.,  
426 Metz, L., 2020. Improving a brush management assessment tool using drone technology and  
427 enhanced Landsat image processing, in: Society for Range Management Conference. Denver, CO.
- 428 Hugenholtz, C., Brown, O., Walker, J., Barchyn, T., Nesbit, P., Kucharczyk, M., Myshak, S., 2016. Spatial  
429 Accuracy of UAV-Derived Orthoimagery and Topography: Comparing Photogrammetric Models  
430 Processed with Direct Geo-Referencing and Ground Control Points. *GEOMATICA* 70, 21–30.  
431 <https://doi.org/10.5623/cig2016-102>
- 432 James, M.R., Robson, S., D’Oleire-Oltmanns, S., Niethammer, U., 2017. Optimising UAV topographic  
433 surveys processed with structure-from-motion: Ground control quality, quantity and bundle  
434 adjustment. *Geomorphology* 280, 51–66. <https://doi.org/10.1016/j.geomorph.2016.11.021>
- 435 Jensen, J.L.R., Mathews, A.J., 2016. Assessment of Image-Based Point Cloud Products to Generate a Bare  
436 Earth Surface and Estimate Canopy Heights in a Woodland Ecosystem. *Remote Sens.* 8.  
437 <https://doi.org/10.3390/rs8010050>
- 438 Laliberte, A.S., Rango, A., 2011. Image Processing and Classification Procedures for Analysis of Sub-  
439 decimeter Imagery Acquired with an Unmanned Aircraft over Arid Rangelands. *GIScience Remote*  
440 *Sens.* 48, 4–23. <https://doi.org/10.2747/1548-1603.48.1.4>
- 441 Louhaichi, M., Borman, M.M., Johnson, D.E., 2001. Spatially Located Platform and Aerial Photography  
442 for Documentation of Grazing Impacts on Wheat. *Geocarto Int.* 16, 65–70.  
443 <https://doi.org/10.1080/10106040108542184>
- 444 McClaran, M.P., Angell, D.L., Wissler, C., 2002. Santa rita experimental range digital database: User’s  
445 guide. USDA For. Serv. - Gen. Tech. Rep. RMRS-GTR 1–16. <https://doi.org/10.2737/RMRS-GTR-100>

- 446 Michez, A., Lejeune, P., Bauwens, S., Lalaina Herinaina, A.A., Blaise, Y., Muñoz, E.C., Lebeau, F., Bindelle,  
447 J., 2019. Mapping and monitoring of biomass and grazing in pasture with an unmanned aerial  
448 system. *Remote Sens.* 11, 1–14. <https://doi.org/10.3390/rs11050473>
- 449 Mulakala, J., 2019. Measurement Accuracy of the DJI Phantom 4 RTK & Photogrammetry.
- 450 Olsoy, P.J., Shipley, L.A., Rachlow, J.L., Forbey, J.S., Glenn, N.F., Burgess, M.A., Thornton, D.H., 2018.  
451 Unmanned aerial systems measure structural habitat features for wildlife across multiple scales.  
452 *Methods Ecol. Evol.* 9, 594–604. <https://doi.org/10.1111/2041-210X.12919>
- 453 Rehak, M., Mabillard, R., Skaloud, J., 2013. a Micro-Uav With the Capability of Direct Georeferencing.  
454 *Int. Arch. Photogramm. Remote Sensing, Beijing, China XL*, 4–6.  
455 <https://doi.org/10.5194/isprsarchives-XL-1-W2-317-2013>
- 456 Sanz-Ablanedo, E., Chandler, J., Rodríguez-Pérez, J., Ordóñez, C., Sanz-Ablanedo, E., Chandler, J.H.,  
457 Rodríguez-Pérez, J.R., Ordóñez, C., 2018. Accuracy of Unmanned Aerial Vehicle (UAV) and SfM  
458 Photogrammetry Survey as a Function of the Number and Location of Ground Control Points Used.  
459 *Remote Sens.* 2018, Vol. 10, Page 1606 10, 1606. <https://doi.org/10.3390/RS10101606>
- 460 Sayre, N.F., Biber, E., Marchesi, G., 2013. Social and Legal Effects on Monitoring and Adaptive  
461 Management: A Case Study of National Forest Grazing Allotments, 1927-2007. *Soc. Nat. Resour.*  
462 26, 86–94. <https://doi.org/10.1080/08941920.2012.694579>
- 463 Settlage, R., Chalker, A., Franz, E., Johnson, D., Gallo, S., Moore, E., Hudak, D., 2019. Open OnDemand:  
464 HPC for Everyone, in: Weiland, M., Juckeland, G., Alam, S., Jagode, H. (Eds.), *High Performance*  
465 *Computing*. Springer International Publishing, Cham, pp. 504–513.
- 466 Smith, M.W., Carrivick, J.L., Quincey, D.J., 2015. Structure from motion photogrammetry in physical  
467 geography. *Prog. Phys. Geogr.* 40, 247–275. <https://doi.org/10.1177/0309133315615805>
- 468 Snavely, N., Seitz, S.M., Szeliski, R., 2008. Modeling the world from Internet photo collections. *Int. J.*  
469 *Comput. Vis.* 80, 189–210. <https://doi.org/10.1007/s11263-007-0107-3>

470 Steele, C.M., Bestelmeyer, B.T., Burkett, L.M., Smith, P.L., Yanoff, S., 2012. Spatially explicit  
471 representation of state-and-transition models. *Rangel. Ecol. Manag.* 65, 213–222.  
472 <https://doi.org/10.2111/REM-D-11-00047.1>

473 Sundt, P., 2002. The statistical power of rangeland monitoring data. *Rangel. J.* 24, 16–20.  
474 [https://doi.org/10.2458/azu\\_rangelands\\_v24i2\\_sundt](https://doi.org/10.2458/azu_rangelands_v24i2_sundt)

475 Toevs, G.R., Karl, J.W., Taylor, J.J., Spurrier, C.S., Karl, M.S., Bobo, M.R., Herrick, J.E., 2011. Consistent  
476 Indicators and Methods and a Scalable Sample Design to Meet Assessment, Inventory, and  
477 Monitoring Information Needs Across Scales. *Rangelands* 33, 14–20. [https://doi.org/10.2111/1551-](https://doi.org/10.2111/1551-501X-33.4.14)  
478 [501X-33.4.14](https://doi.org/10.2111/1551-501X-33.4.14)

479 West, N.E., 2003. Theoretical Underpinnings of Rangeland Monitoring. *Arid L. Res. Manag.* 17, 333–346.  
480 <https://doi.org/10.1080/713936112>

481 Westoby, M.J., Brasington, J., Glasser, N.F., Hambrey, M.J., Reynolds, J.M., 2012. ‘Structure-from-  
482 Motion’ photogrammetry: A low-cost, effective tool for geoscience applications. *Geomorphology*  
483 179, 300–314. <https://doi.org/10.1016/j.geomorph.2012.08.021>

484 Williams, B.K., Szaro, R.C., Shapiro, C.D., 2009. Adaptive Management: the U.S. Department of the  
485 Interior Technical Guide. Adaptive Management Working Group, U.S. Department of the Interior,  
486 Washington, DC.

487

488

489

490

491

492

493

494 *Table 1. Hardware and image acquisition specifications for the data collection campaigns that occurred in May*  
495 *2019 and repeated in September 2019*  
496

|                                         |                                                     |
|-----------------------------------------|-----------------------------------------------------|
| <i>Aircraft</i>                         | DJI Phantom 4 RTK                                   |
| <i>Sensor</i>                           | 20 mpx; RGB;<br>Global Shutter                      |
| <i>Aperture &amp; Shutter</i>           | Automatic                                           |
| <i>Image format</i>                     | Jpeg; ~8 mb; 8 bit                                  |
| <i>Autopilot</i>                        | DJI GS RTK                                          |
| <i>Acquisition Pattern</i>              | Single Grid at Nadir;<br>Double Grid at 30° Oblique |
| <i>Image forward &amp; side overlap</i> | 80%                                                 |
| <i>Flying Height</i>                    | 38 m above ground                                   |
| <i>Flying Speed</i>                     | 3 m/s                                               |
| <i>Flying time ha<sup>-1</sup></i>      | ~10 min.                                            |
| <i>Ground Sampling</i>                  | 1 cm                                                |
| <i>No. of Flight Plots</i>              | 53                                                  |
| <i>Plot Sizes</i>                       | 1.6 – 7.1 ha                                        |
| <i>Images Plot<sup>1</sup></i>          | 278 – 1563                                          |
| <i>Images ha<sup>-1</sup></i>           | ~200                                                |
| <i>Total Raw Imagery Size</i>           | 341 GB                                              |
| <i>Total Image Product Size</i>         | 561 GB                                              |
| <i>Total Area Imaged</i>                | 193.1 ha                                            |
| <i>No. of Flying Days</i>               | 12                                                  |

497

498

499

500

501

502

503

504

505

506

507 *Table 2. Structure-from-motion photogrammetry processing parameter settings using Agisoft Metashape 1.5.2.*  
 508

| Parameter                                                   | Setting                                                                                                                                                                                                 |
|-------------------------------------------------------------|---------------------------------------------------------------------------------------------------------------------------------------------------------------------------------------------------------|
| <i>Photo Alignment</i>                                      | Quality: Medium<br>Geometric Self-calibration: Yes<br>Generic Pre-selection: Yes<br>Reference Pre-selection: Yes<br>Adaptive Camera Model Fitting: Yes<br>Key point limit: 50,000<br>Tie point limit: 0 |
| <i>Camera Accuracy (m):</i>                                 | Long: 0.010; Lat:0.009; Alt: 0.021                                                                                                                                                                      |
| <i>Tie Point Accuracy (pix)</i>                             | 0.3                                                                                                                                                                                                     |
| <i>Poor Quality Point Removal (using gradual selection)</i> | Reconstruction Uncertainty: >13<br>Projection Accuracy: >10<br>Reprojection Error: >0.25                                                                                                                |
| <i>Camera Optimization</i>                                  | Adaptive Fitting: Yes                                                                                                                                                                                   |
| <i>Dense Point Cloud</i>                                    | Quality: High<br>Filtering: Mild                                                                                                                                                                        |
| <i>Point Filtering for DTM</i>                              | Select Ground Points by Color: r255, g220, b178<br>Classify Ground Points:<br>Max angle: 3.0°<br>Max distance: 0.09 cm<br>Cell size: 4 m                                                                |
| <i>DSM and DTM generation</i>                               | Point Cloud: Dense Cloud<br>Interpolation: Enabled                                                                                                                                                      |
| <i>Orthomosaic generation</i>                               | Blending Mode: Mosaic<br>Fill Holes: Yes<br>Surface: Sparse point cloud DEM<br>Images used: Nadir only<br>Spatial Resolution: 1 cm                                                                      |

509

510

511 *Table 3. Number of workdays to collect, process, and analyze drone imagery collected in May 2019*

|                                         | <i>Task</i>                      |                        |                      |                         |                                   | <i>Total</i> |
|-----------------------------------------|----------------------------------|------------------------|----------------------|-------------------------|-----------------------------------|--------------|
|                                         | <i>Survey GCPs or Benchmarks</i> | <i>Collect Imagery</i> | <i>Identify GCPs</i> | <i>Image Processing</i> | <i>Orthomosaic Classification</i> |              |
| <i>Conventional Workflow (estimate)</i> | 30                               | 16                     | 20                   | 75                      | 0.35                              | 141.35       |
| <i>Innovative Workflow</i>              | 3                                | 12                     | 0                    | 15                      | 0                                 | 30           |

512

513

514

515

516

517

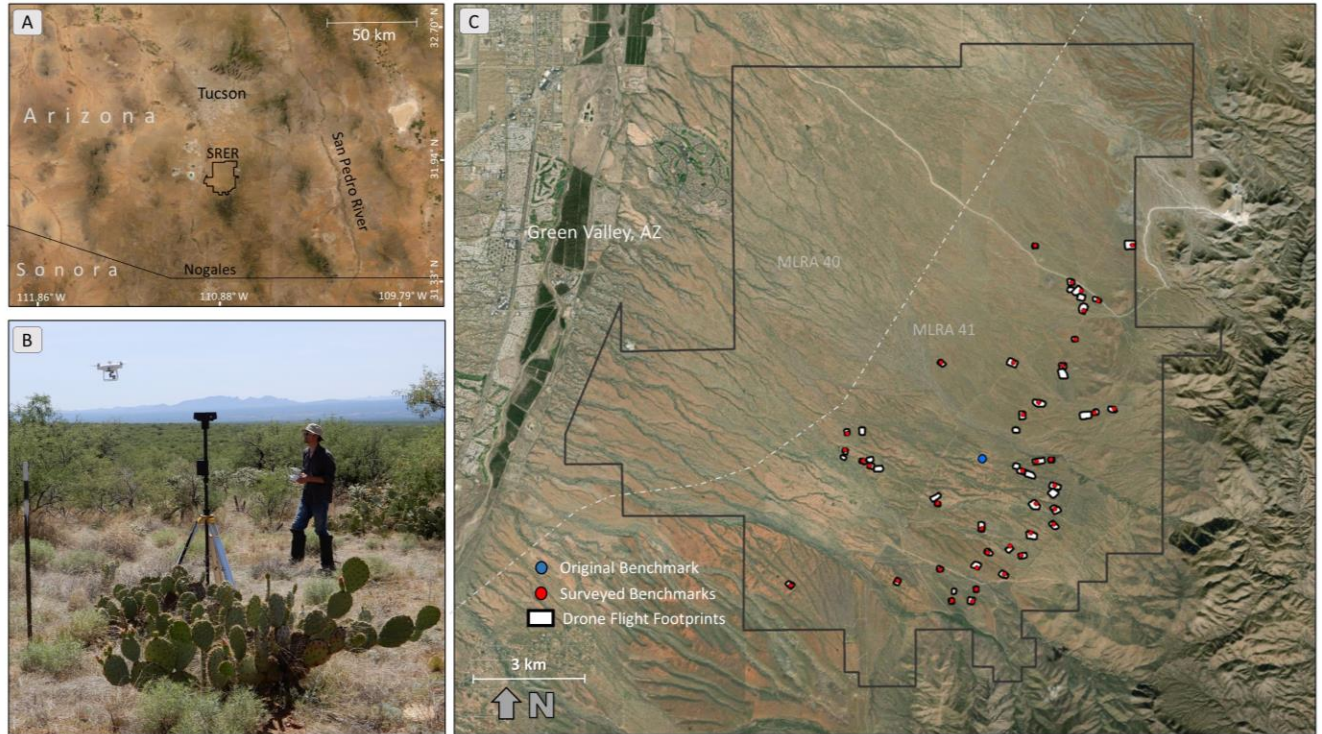

518

519 *Fig. 1. A) This project occurred at Santa Rita Experimental Range (SRER) in southern Arizona. B) We collected aerial*  
520 *imagery using a DJI Phantom 4 RTK with portable base station. C) We collected imagery at 53 flight plots covering a*  
521 *total of 193 ha in May 2019 and repeated in September 2019. The drone was launched near surveyed benchmarks*  
522 *(shown as red points).*

523

524

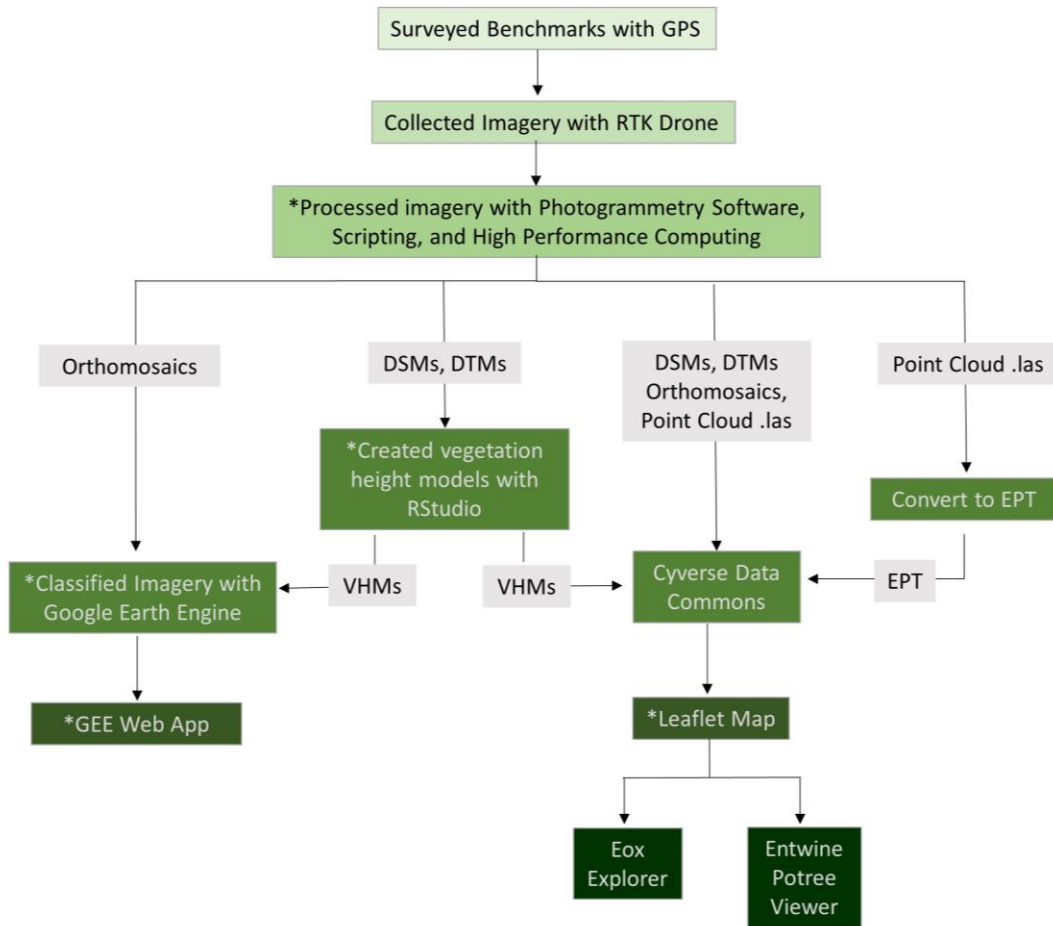

525

526 *Fig. 2. Workflow for data collection, processing, and sharing. DSMs = digital surface models; DTMs = digital terrain*  
527 *models; VHMs = vegetation height models; EPT = entwine point tile. Items with \* have available code.*

528

529

530

531

532



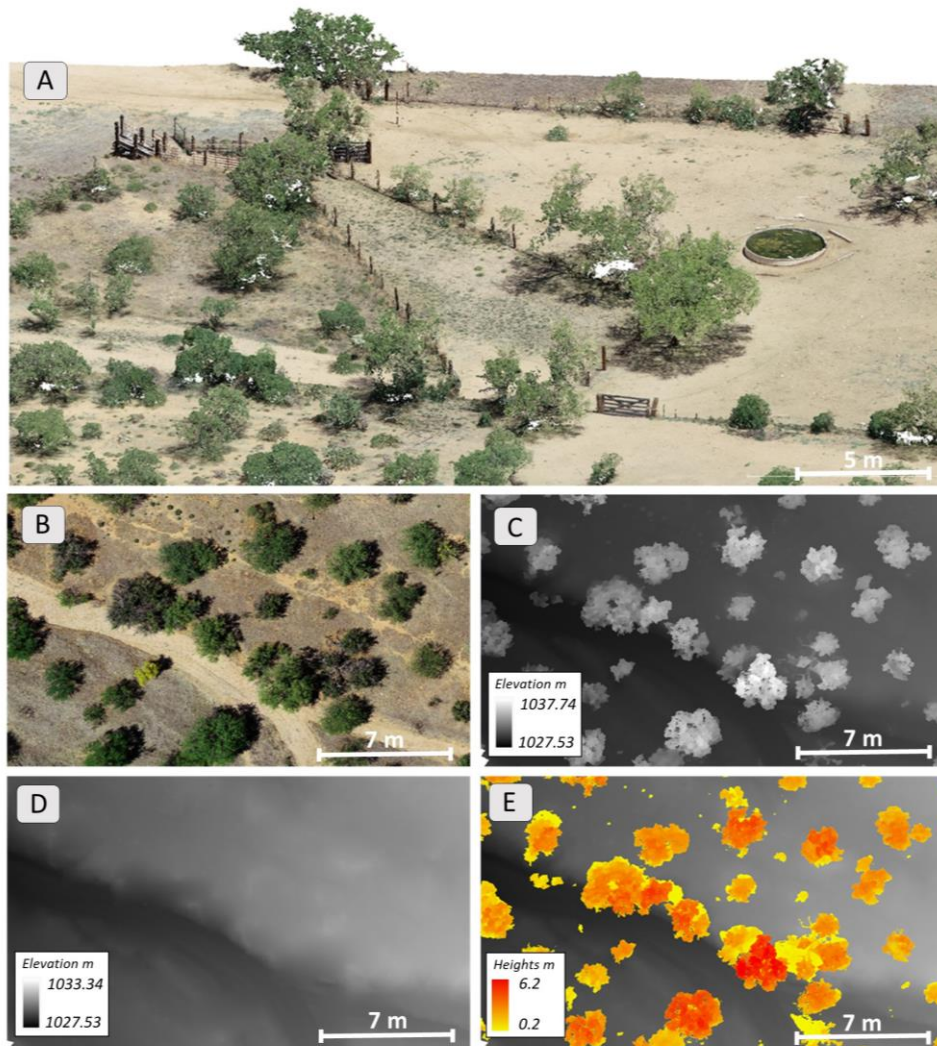

533

534 *Fig. 3. Imagery products created from drone imagery, including A) Dense point cloud; B) True-color Orthomosaic; C)*  
535 *Digital surface model; D) Digital terrain model; and E) Vegetation height model.*

536

537

538

539

540

541

542

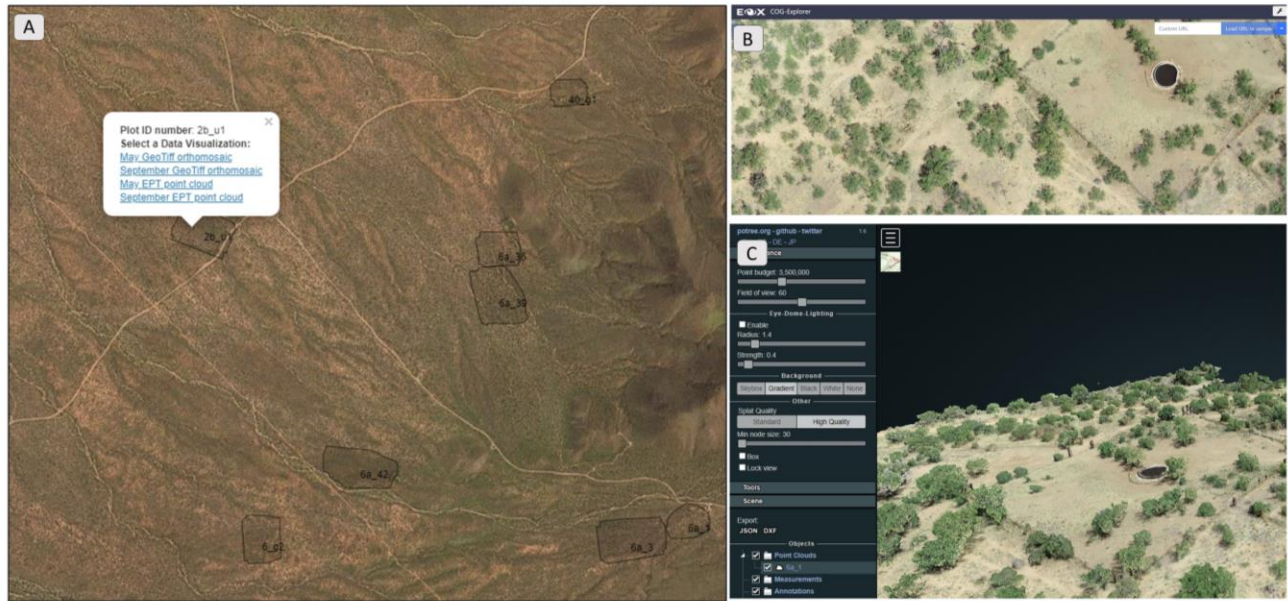

543

544 *Fig. 4. A) We created an open-source Leaflet map to enable collaborators to view imagery products through a web-*  
545 *browser (<https://de.cyverse.org/....pending DOI>). B) High-resolution orthomosaics can be viewed with Eox COG*  
546 *Explorer. C) Point clouds can be viewed with a Potree viewer.*

547

548

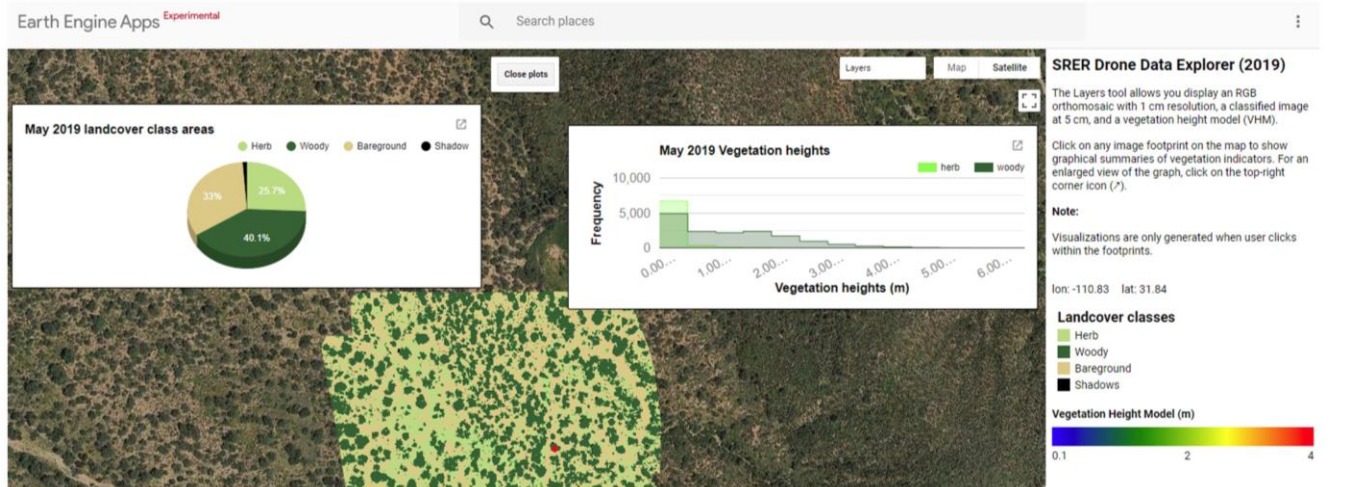

549

550 *Fig. 5. We developed Google Earth Engine web-app showing classified maps, vegetation height models, and*  
551 *indicator summaries for vegetation cover and heights. <https://bit.ly/srer-drone-2019>*

552
